# Supplementary material for: Detection and quantification of food colorant adulteration in saffron sample using chemometric analysis of FT-IR spectra
Source: Royal Society of Chemistry journal article supplement (doi:10.1039/c5ra25983e), 2016-01-01
Supplement: c5ra25983e1.pdf [file c5ra25983e1.pdf]

**Table S1.** Major IR absorption bands and possible assignment in the typical FT-IR spectrum of saffron

| <i>Band (cm<sup>-1</sup>)*</i>                 | <i>Assignment</i>                                                                                                                                                |
|------------------------------------------------|------------------------------------------------------------------------------------------------------------------------------------------------------------------|
| 3365–3333 (broad)                              | Stretching vibration of bonded and non-bonded –O–H groups                                                                                                        |
| 2924 (m) and 2857 (m)                          | Asymmetric –CH <sub>2</sub> –, symmetric –CH <sub>3</sub> and –CH <sub>2</sub> – stretching vibrations                                                           |
| 1745–1696 (sh)                                 | –C=O stretching vibrations (e.g. in the –COOR groups of crocetin/–COOH groups of aminoacids)                                                                     |
| 1659–1653 (s)                                  | =C–H stretching vibrations (e.g. in the RCH=CHR' groups of crocetin)/amide I/O–H bending vibrations in water                                                     |
| 1613 (m)                                       | C–C skeletal vibrations                                                                                                                                          |
| 1580–1578 (m) and 1545–1542 (sh)               | C–O vibrations (e.g. in the –COOR groups of crocetin)/amide II/aromatic –C=C stretching vibrations                                                               |
| 1454 (w)                                       | C–H bending (scissoring) (in CH <sub>3</sub> groups)/aromatic –C=C stretching vibrations                                                                         |
| 1400 (w) and 1375 (w)                          | –OH bending vibrations, –C–O–H in-plane bending vibrations, –CH <sub>3</sub> out-of-plane bending vibrations, –CH <sub>2</sub> – wagging and twisting vibrations |
| 1317 (w), 1294–1292 (w), 1271 (w) and 1227 (s) | C(O)–O stretching vibrations and –OH in plane vibrations/amide III (e.g. in aromatic ethers)                                                                     |
| 1157 (sh)                                      | C–O stretching vibrations (e.g. in C–O–C glycosidic linkages of oligosaccharides or in triacylglycerols)                                                         |
| 1075 (s)                                       | C–1–H bending vibration in sugars                                                                                                                                |
| 1020 (sh)                                      | C–4–OH (typical for glucose residue of disaccharides)                                                                                                            |
| 970–920 (sh)                                   | trans = C–H out-of-plane bending                                                                                                                                 |
| 780–700 (w)                                    | cis = C–H out-of-plane bending                                                                                                                                   |

\* m: medium; s: strong; sh: shoulder; w: weak.

**Table S2.** The results of PCA application on the transmittance FT-IR spectral data of Saffron samples

| Component | Eigen-value | Percent of Variance | Cumulative percent of variances |
|-----------|-------------|---------------------|---------------------------------|
| 1         | 14.5        | 77.80               | 77.80                           |
| 2         | 3.20        | 17.13               | 94.92                           |
| 3         | 1.06        | 2.69                | 97.61                           |
| 4         | 0.23        | 0.83                | 98.45                           |

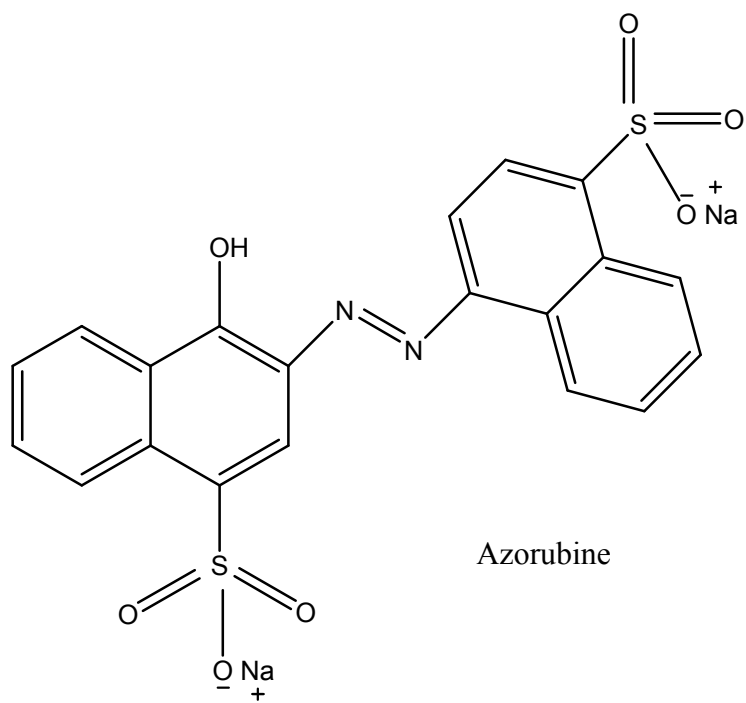

Azorubine

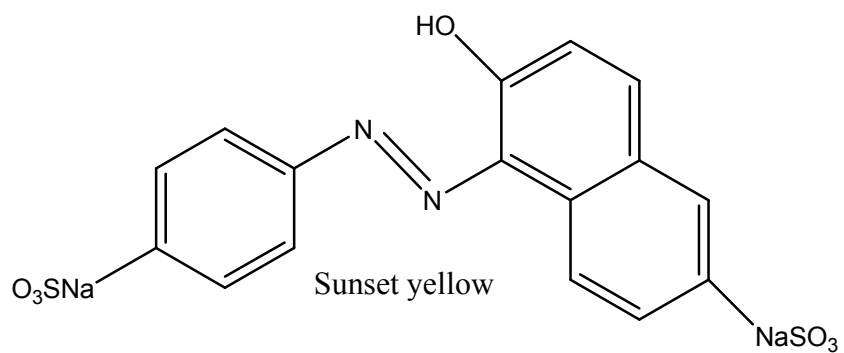

Sunset yellow

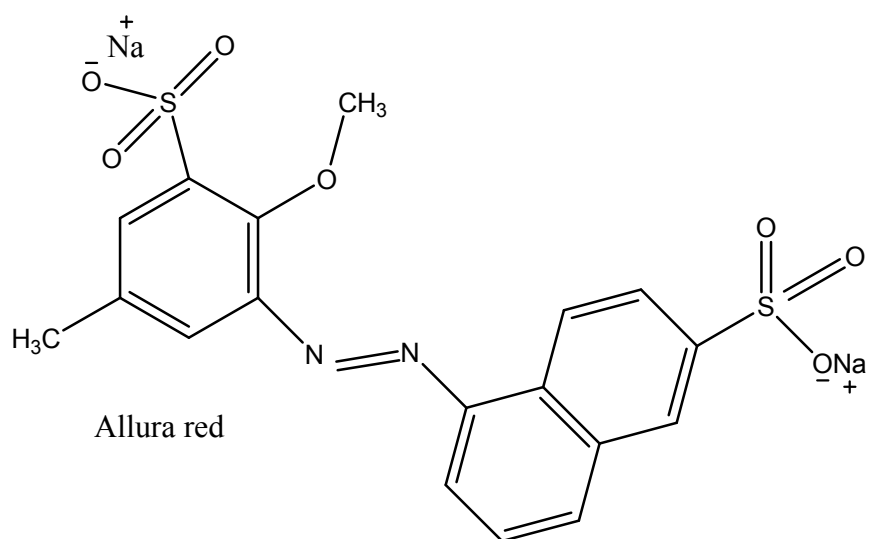

Allura red

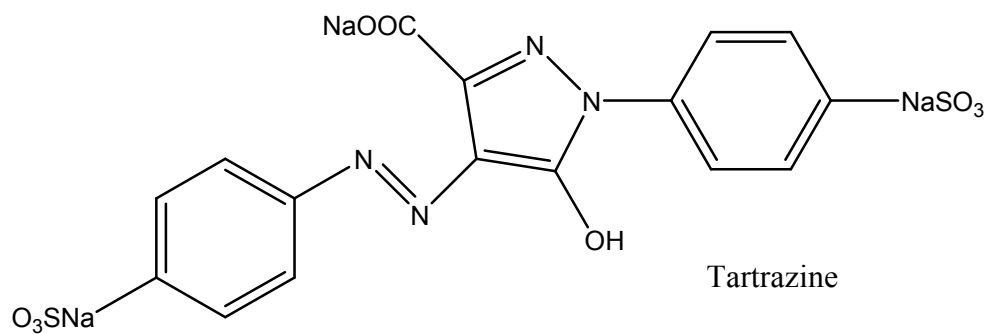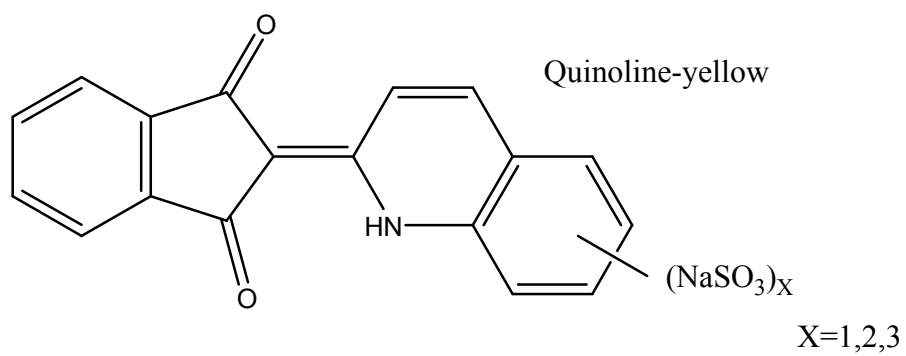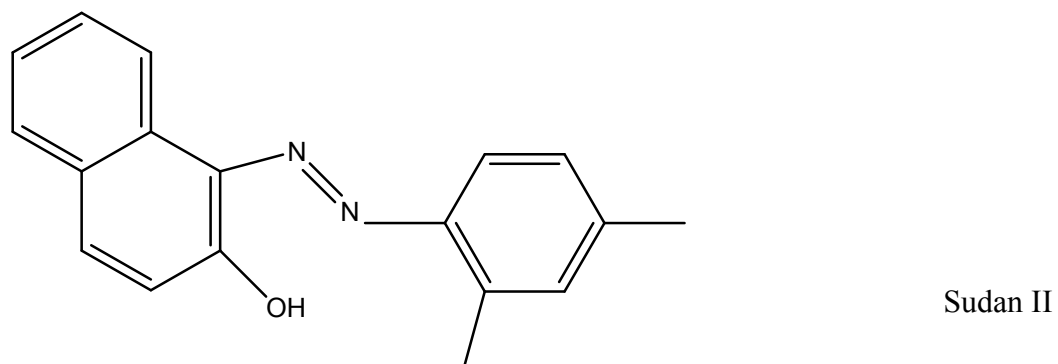

**Figure (S1)** .Chemical structure of food colorant

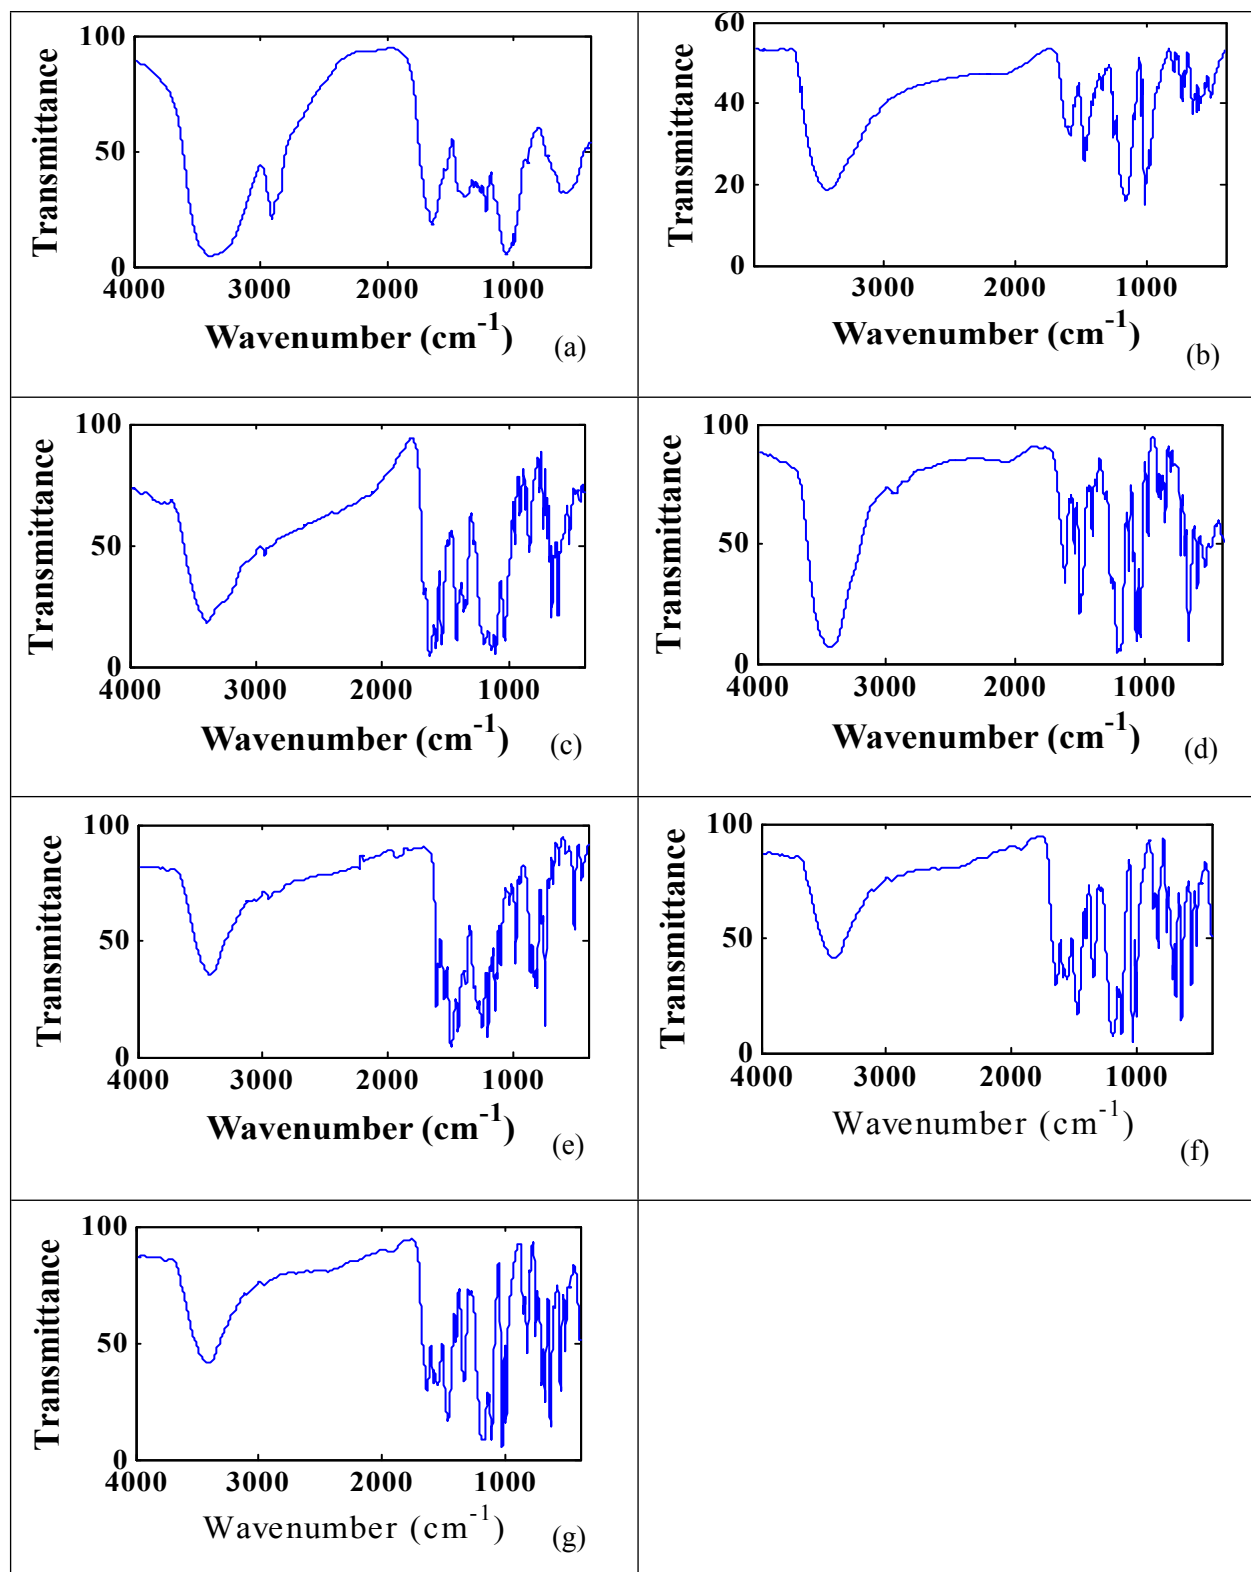

**Figure (S2).** (a) Saffron (b) Azorubine (c) Quinoline yellow (d) Allura red (e) Sudan (II) (f) Sunset yellow (g) Tartrazine

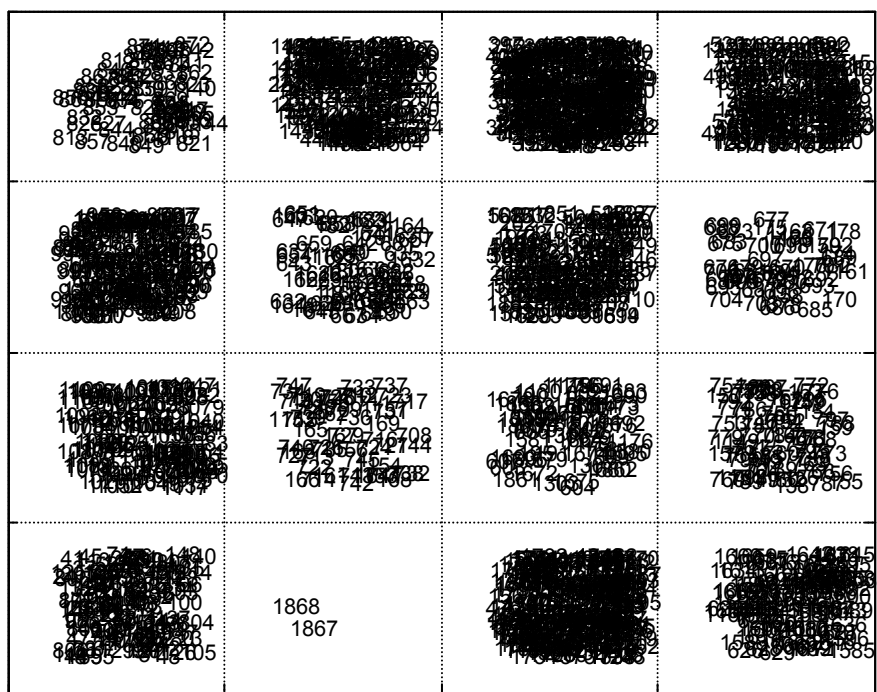

**Figure S3.** Distribution pattern of the wavenumbers from saffron data set obtained using 4-node Kohonen SOM for clustering of wavenumbers. The numbers from 1–1868 refer to the wavenumber transmittance data set.

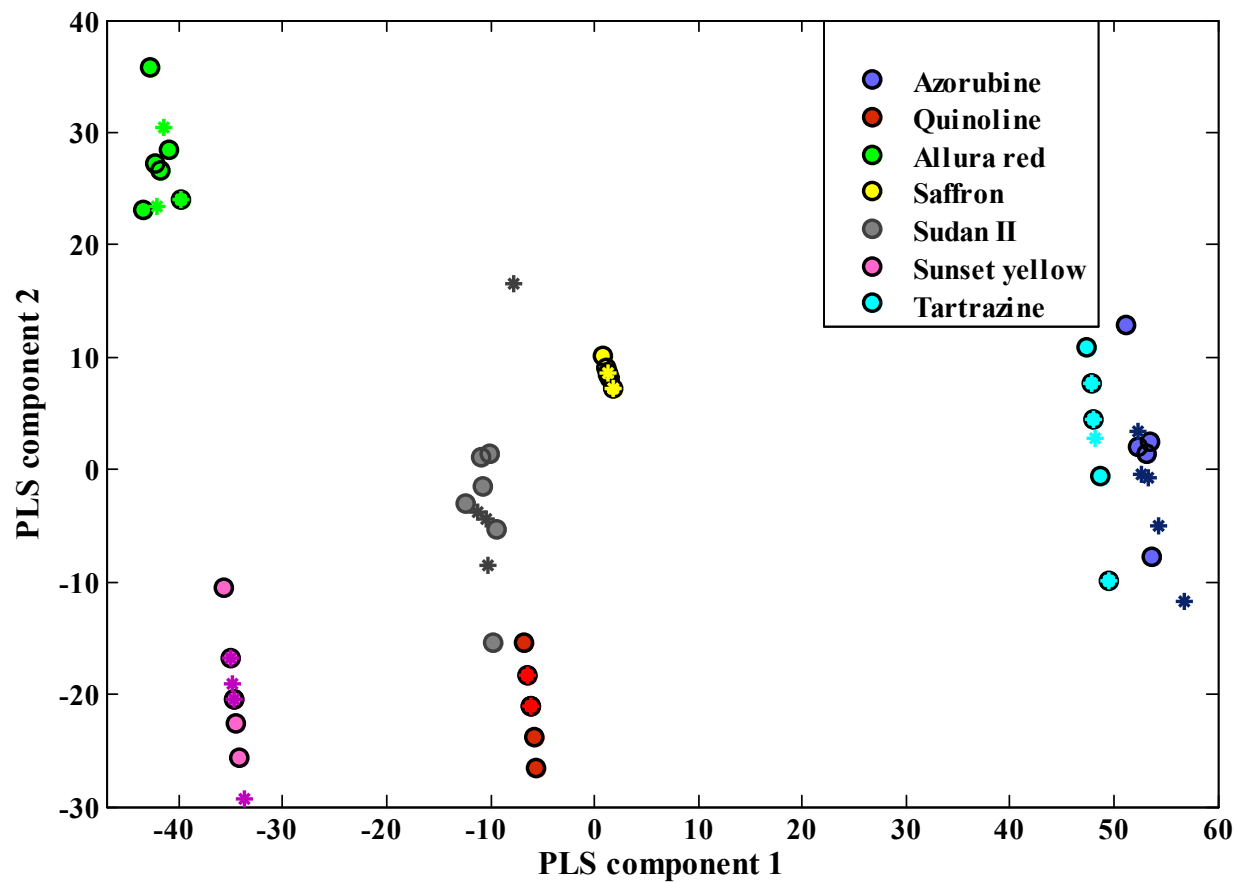

**Figure (S4).** Distribution pattern of the standard saffron and adulteration ones in the two-dimensional PLS-DA based factor space of their transmittance FT-IR spectra

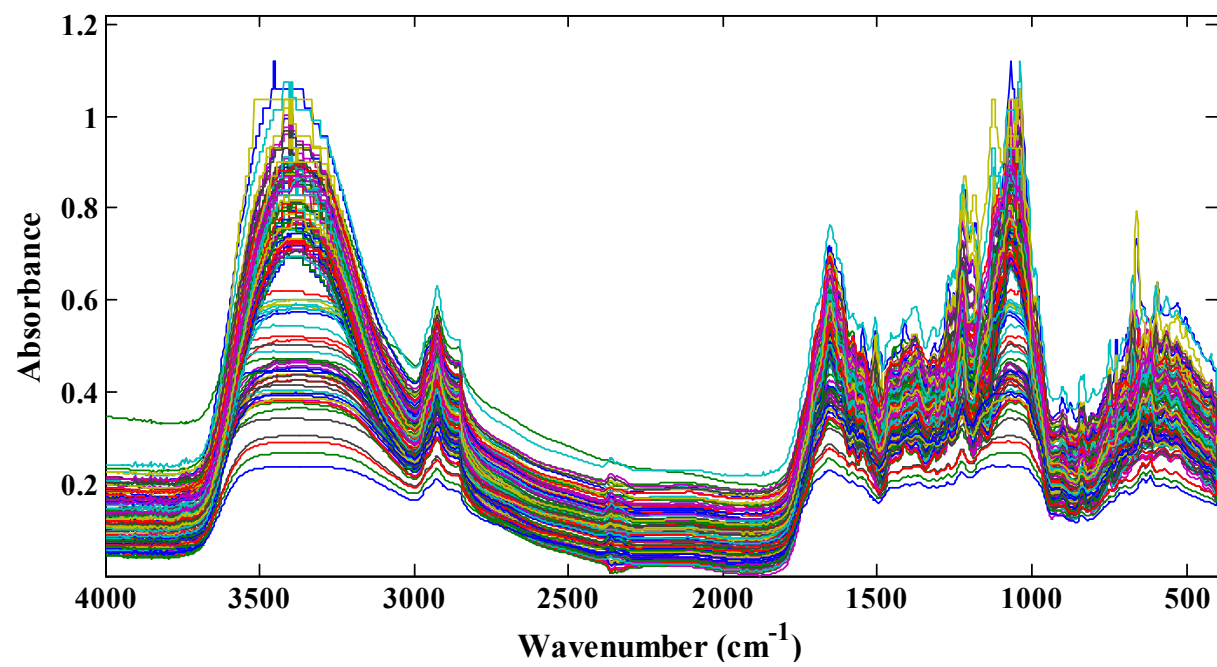

**Figure (S5).** Absorbance FT-IR spectra of food colorant adulteration in saffron samples
